# Supplementary material for: Complementary peptides represent a credible alternative to agrochemicals by activating translation of targeted proteins
Source: PubMed Central journal article supplement (PMC9845214; doi:10.1038/s41467-023-35951-0), 2023-01-17
Supplement: 41467_2023_35951_MOESM3_ESM.pdf [file 41467_2023_35951_MOESM3_ESM.pdf]

## Description of Additional Supplementary Files

**File Name:** Supplementary Data 1

**Description:** list of peptides used in this study.
